# Supplementary material
Source: publisher site journal article supplement (https://www.dovepress.com/article/246613)
Supplement: Supplementary file 1 [file get_supplementary_file.php]

| Table S1. Primer sequences | |  |
| --- | --- | --- |
| **Gene** | **Sequence** | |
| GAPDH | F: 5’-AACTTTGGTATCGTGGAAGGAC-3’ | R: 5’-CAGTAGAGGCAGGGATGATGTT-3’ |
| RRM2 | F: 5’-TATATCCCATGTTCTGGCTTTC-3’ | R: 5’-GCGGGCTTCTGTAATCTG-3’ |

| Table S2. Signaling pathway enrichment analysis of upregulated DGEs in LPS | | | | |
| --- | --- | --- | --- | --- |
| **Term** | **Description** | **Count** | **P. Value** | **Genes** |
| HSA-04110 | Cell cycle | 24 | <0.001 | PTTG1, SKP2, CDK4, CDC20, MAD2L1, CDC7, PRKDC, ORC5, MCM2, SMC1A, CDKN2A, CCNB1, CCNB2, CDC23, MCM4, MCM5, CDC25B, CDK1, MCM6, PCNA, BUB1B, MDM2, CCNA2, TTK |
| HSA-05166 | HTLV-I infection | 18 | <0.001 | PTTG1, CDK4, CDC20, FZD1, MAD2L1, BAX, XPO1, FZD7, CDKN2A, FZD2, CCNB2, WNT5A, CDC23, ADCY1, CALR, PCNA, BUB1B, POLE2 |
| HSA-05165 | Human papillomavirus infection | 15 | 0.002 | PKM, CDK4, FZD1, BAX, FZD7, COL6A2, FZD2, COL1A1, COL6A1, ISG15, WNT5A, COL1A2, MDM2, CCNA2, FN1 |
| HSA-03030 | DNA replication | 10 | <0.001 | FEN1, RFC4, RFC3, MCM2, LIG1, MCM4, MCM5, MCM6, PCNA, POLE2 |
| HSA-04114 | Oocyte meiosis | 10 | <0.001 | PTTG1, CDC20, MAD2L1, SMC1A, CCNB1, CCNB2, CDC23, ADCY1, CDK1, AURKA |
| HAS-04974 | Protein digestion and absorption | 9 | <0.001 | COL5A2, COL21A1, COL6A2, COL3A1, COL1A1, COL6A1, COL5A1, COL1A2, ATP1B1 |
| HAS-04914 | Progesterone-mediated oocyte maturation | 9 | <0.001 | MAD2L1, CCNB1, CCNB2, CDC23, CDC25B, ADCY1, CDK1, CCNA2, AURKA |
| HAS-04218 | Cellular senescence | 9 | 0.004 | CDK4, CDKN2A, CCNB1, FOXM1, CCNB2, CDK1, MDM2, CCNA2, RBBP4 |
| HAS-04115 | p53 signaling pathway | 8 | <0.001 | RRM2, CDK4, BAX, CDKN2A, CCNB1, CCNB2, CDK1, MDM2 |
| HAS-04512 | ECM-receptor interaction | 8 | <0.001 | CD47, SDC1, COL6A2, COL1A1, COL6A1, COL1A2, HMMR, FN1 |
| HAS-04933 | AGE-RAGE signaling pathway in diabetic complications | 7 | 0.003 | CDK4, BAX, MMP2, COL3A1, COL1A1, COL1A2, FN1 |
| HAS-03410 | Base excision repair | 5 | <0.001 | FEN1, LIG1, PCNA, MBD4, POLE2 |
| HAS-03420 | Nucleotide excision repair | 5 | 0.002 | RFC4, RFC3, LIG1, PCNA, POLE2 |
| HAS-03430 | Mismatch repair | 4 | <0.001 | RFC4, RFC3, LIG1, PCNA |

**Abbreviations:** LPS, liposarcoma; DEGs, differentially expressed genes.


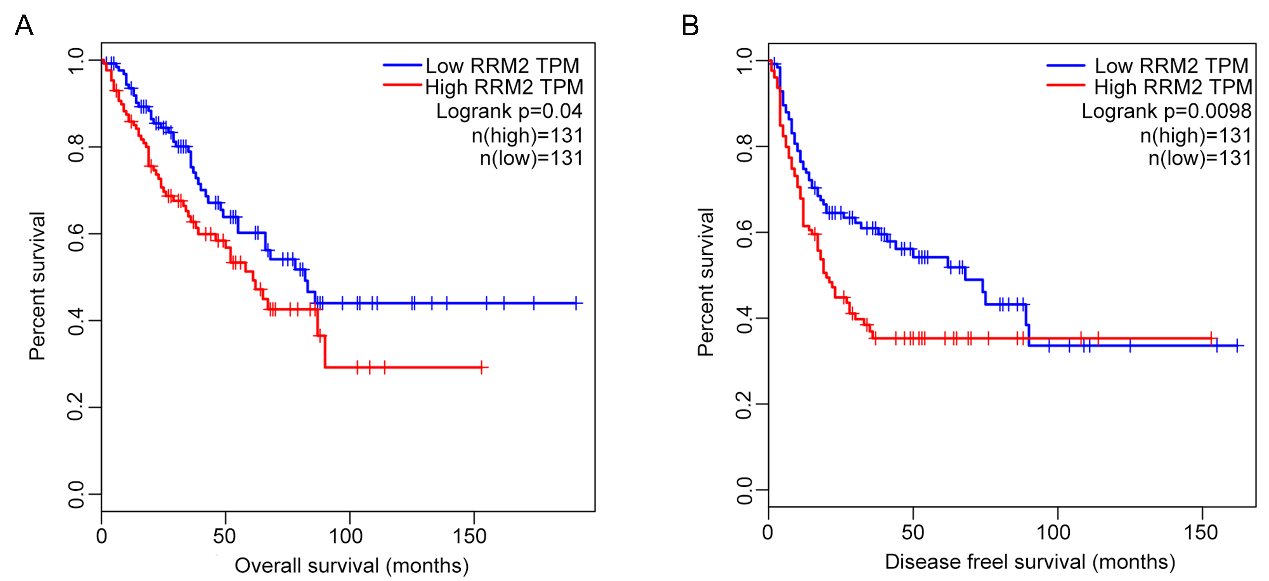


**Figure S1. Correlation of RRM2 expression with survival of sarcoma patients in DEPIA database.** The survival curve of RRM2 in DEPIA database showed that sarcoma patients with RRM2-positive expression (n=131) had a worse (A) overall survival (P=0.04) and (B) disease free survival (P=0.0098) than those with RRM2-negative expression (n=131). TPM: Transcripts per million reads.
